# Supplementary material for: Clinical and Biochemical Characteristics of Dengue Infections in Children From Sri Lanka
Source: PubMed Central journal article supplement — Glob Pediatr Health. 2020 Nov 22;7:2333794X20974207. doi: 10.1177/2333794X20974207 (PMC7686613; doi:10.1177/2333794x20974207), 2020-11-22
Supplement: sj-pdf-1-gph-10.1177_2333794X20974207.pdf [file sj-pdf-1-gph-10.1177_2333794X20974207.pdf]

# **Clinical and biochemical characteristics of dengue infections in children from Sri Lanka**

## **Annexure 1: Locally modified version of WHO 1997 dengue classification and case definitions**

### **Dengue Fever**

- Probable—an acute febrile illness with two or more of the following manifestations:

- Headache
- Retro-orbital pain
- Myalgia
- Arthralgia
- Rash
- Haemorrhagic manifestations
- Leukopenia;

And

- Supportive serology

Or

- Occurrence at the same location and time as other confirmed cases of dengue fever

### **Dengue Haemorrhagic Fever**

- Fever, or history of acute fever, lasting 2–7 days, occasionally biphasic, with

Evidence of plasma leakage due to increased vascular permeability, manifested by at least one of the following:

- a rise in the haematocrit equal to or greater than 20% above average for age, sex and population or baseline if known;
- a drop in the haematocrit following volume-replacement treatment equal to or greater than 20% of baseline;
- signs of plasma leakage such as pleural effusion, ascites and hypoproteinaemia.
- radiological evidence of plasma leakage

\*Presence of bleeding/ positive tourniquet test was not used as a mandatory criteria as it is unreliable in dark skinned patients.

\*Thrombocytopenia (100000 cells per mm<sup>3</sup> or less) was not taken as a mandatory criteria as plasma leakage was seen in those with platelet count > 100000 cells per mm<sup>3</sup>.

### **Dengue shock syndrome**

The above criteria of DHF must be present, plus evidence of circulatory failure manifested by:

- Rapid and weak pulse, and
- Narrow pulse pressure (,20 mmHg (2.7 kPa) )

or manifested by:

- Hypotension for age, and
- Cold, clammy skin and restlessness.

### **Grading severity of dengue haemorrhagic fever**

DHF is classified into four grades of severity, where grades III and IV are considered to be DSS. The presence of plasma leakage with concurrent haemoconcentration differentiates grades I and II DHF from DF.

Grade I: Fever accompanied by non-specific constitutional symptoms; without overt bleeding manifestations.

Grade II: Spontaneous bleeding in addition to the manifestations of Grade I patients, usually in the forms of skin or other haemorrhages.

Grade III: Circulatory failure manifested by a rapid, weak pulse and narrowing of pulse pressure or hypotension, with the presence of cold, clammy skin and restlessness.

Grade IV: Profound shock with undetectable blood pressure or pulse.
